# Supplementary material for: Construction of a reusable multi-enzyme supramolecular device via disulfide bond locking
Source: Royal Society of Chemistry journal article supplement (doi:10.1039/c5cc02544c), 2015-01-01
Supplement: c5cc02544c2.pdf [file c5cc02544c2.pdf]

## Supporting Information

# Construction of a Reusable Multi-enzyme Supramolecular Device via Disulfide Bond Locking

Xin Gao,<sup>a</sup> Chengcheng Zhao,<sup>a</sup> Ting Yu,<sup>a</sup> Shengli Yang,<sup>a</sup> Yuhong Ren<sup>a,\*</sup> and Dongzhi Wei<sup>a,\*</sup>

<sup>a</sup> State Key Laboratory of Bioreactor Engineering, New World Institute of Biotechnology, East China University of Science and Technology, Shanghai 200237, China.

\*Correspondence to: Y. Ren and D. Wei

E-mail addresses: yhren@ecust.edu.cn (Y. Ren), dzhwei@ecust.edu.cn (D. Wei).

Tel.: +86 21 6425 2163, Fax: +86 21 6425 0068.

## **Materials and Methods**

The plasmids pET21a-LDH-PDZ (containing LPd gene) and pET28a-FDH-PDZlig (containing FPI gene) were constructed previously<sup>1</sup>. KOD-plus-mutagenesis kit was purchased from Toyobo (Osaka, Japan). Trimethylpyruvic acid (TMP), ammonium formate, and NAD(H) were purchased from Sigma-Aldrich (Shanghai, China). All other chemicals were purchased from the Sinopharm Chemical Reagent Co., Ltd. (China) and used without additional purification.

### **Site-directed mutagenesis**

The homology model of PDZ domain associated with PDZ ligand was constructed following the protein modeling protocol of Discovery studio 2.5 (NeoTrident). The site-directed mutagenesis was performed using the KOD-plus-mutagenesis kit, following the instructions of the manufacturer. The primers used to iPCR were 5'- TGCAAAGAGTCTCTGGTGTAAGGATCCGA-3' and 5'- CCCTTATAAACATTTC CAGCCTCTGTTTGC-3' (for MFPI), and 5'- GTGAATGCAAGATGCCGATTCTGA TTAG-3' and 5'-GGCCACCT TTGATGCTAATGCCAG-3' (for MLPd).

### **Protein expression and purification**

Recombinant E. coli BL21 (DE3) strains were cultured in LB medium adding 100 µg/ml ampicillin (for MLPd and LPd) or 50 µg/ml kanamycin (for MFPI and FPI) at 37°C. After OD600 reached to 0.8, isopropyl β-D-1-thiogalactopyranoside (IPTG) was added to 0.1 mM and cells were incubated at 18°C for 18 h. Cells were harvested and resuspended in 20 mM phosphate-buffered saline (PBS; pH 7.0). Then, resuspended cells were lysed by sonicating for 15 min at 0 °C. The supernatant of cell lysates was applied to an AKTA Prime system equipped with a 5-ml HisTrap FF column (GE Healthcare, Waukesha, WI, USA). Protein concentration was determined by the Bradford assay.

### **Activity assay**

The activity of LPd, FPI, MLPd, and MFPI was measured using a SpectraMax 190 spectrophotometer (Molecular Devices, Sunnyvale, CA, USA) by monitoring the increase or decrease in absorbance at 340 nm. The standard assay mixture for formate

hydrogenase activity contained 40 mM ammonium formate, 0.1 mM NAD<sup>+</sup>, and 100 mM phosphate buffer (pH 8.0), while for leucine dehydrogenase activity, the mixture contained 40 mM ammonium chloride, 40 mM TMP, 0.1 mM NADH, and 100 mM phosphate buffer (pH 8.0).

The enzymatic activity for the synthesis of L-tert-leucine was determined by measuring the conversion ratio of TMP. The reaction mixture contained 40 mM ammonium formate, 40 mM TMP, 0.1 mM NAD<sup>+</sup>, and 100 mM phosphate buffer (pH 8.0). After reaction at 30°C and 200 rpm for 1 h, a 20- $\mu$ l sample was removed and analyzed by reverse-phase high-performance liquid chromatography using an 1100 Series chromatograph and SB-Aq column (250  $\times$  4.6 mm, 5  $\mu$ m; Agilent Technologies, Inc., Santa Clara, CA, USA) at 210 nm.

#### **In vitro supramolecular self-assembly and air oxidation**

Freshly purified MLPd (2ml, 20 $\mu$ M) and MFPI (2ml, 20 $\mu$ M) were mixed in a 50-ml shake flask and incubated at 100 rpm, 4 °C for 5-8 h to induce the formation of multienzyme supramolecular devices completely. Then the disulfide-locked LPd-FPI MESDs were collected by centrifuging at 10000 $\times$ g for 10 min, and the precipitated assemblies were subjected to SDS-PAGE under conditions of reduction and non-reduction.

#### **SDS-PAGE**

The gel of SDS-PAGE included separating gel and stacking gel. The separating gel (12% acrylamide/bisacrylamide) contained 1.75 mL of H<sub>2</sub>O, 2 mL of 30% acrylamide/bisacrylamide, 1.25 mL of 4 $\times$ separating gel buffer (1.5 M Tris-HCl, 0.4% SDS, pH 8.8), 30  $\mu$ L of 10% ammonium persulfate, and 3  $\mu$ L of TEMED. The stacking gel (5% acrylamide/bisacrylamide) contained 1.25  $\mu$ L of H<sub>2</sub>O, 335  $\mu$ L of 30% acrylamide/bisacrylamide, 500  $\mu$ L of 4 $\times$ stacking gel buffer (0.5 M Tris-HCl, 0.4% SDS, pH 6.8), 15  $\mu$ L of 10% APS, and 3  $\mu$ L of TEMED. The samples were incubated with reduced loading buffer (containing 2% beta-mercaptoethanol, 5% glycerin, 1% bromophenol blue, 15mM SDS, and 12 mM Tris-HCl, pH6.8) and non-reduced loading buffer (reduced loading buffer without beta-mercaptoethanol).

#### **Field-emission scanning electron microscopy**

For field-emission scanning electron microscopy, samples were prepared by dropping 10  $\mu$ l solution onto freshly cleaved mica for 10 min, washing with deionized water, and drying under air. Images were collected on an SU4800 scanning electron microscope (Hitachi, Tokyo, Japan) operated at 1 kV under deceleration mode.

#### **The reusability of disulfide-locked LPd-FPI MESDs**

The reusability of the disulfide-locked LPd-FPI MESDs under conditions of repeated centrifuging isolation (10000 $\times$ g, 3 min) and reuse was investigated under conditions similar to those employed for the activity assay of synthesis of L-tert-leucine. The residual activity of the disulfide-locked LPd-FPI MESDs after each cycle was normalized to the initial value (the initial activity was defined as 100%).

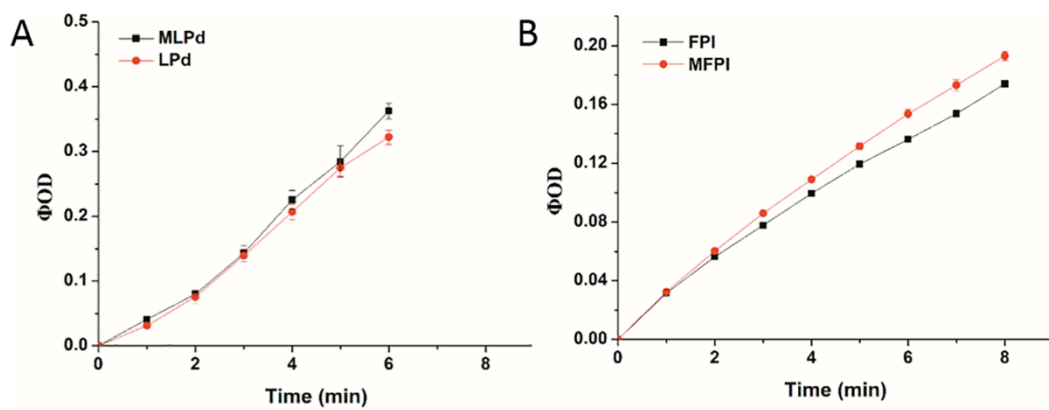

**Figure S1** Enzyme activity assay for (A) MLPd and LPd, and (B) MFPI and FPI.  $\Phi$ OD, absolute value of optical density changes at 340 nm. Each data point represents the mean  $\pm$  standard deviation of three measurements.

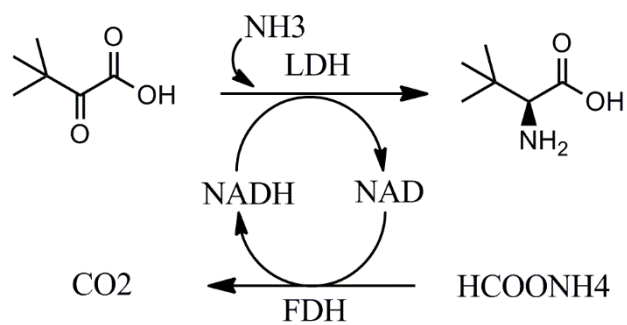

**Figure S2** Reaction scheme for conversion of trimethylpyruvic acid to L-tert-leucine.

FDH represents formate dehydrogenase, and LDH represents leucine dehydrogenase.

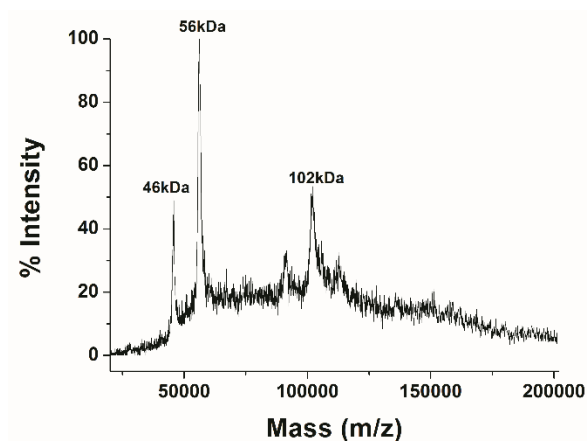

Figure S3. Results of Matrix-Assisted Laser Desorption/ Ionization Time of Flight Mass Spectrometry. The samples was prepared by treating disulfide-locked LPd-FPI MESDs with denaturing buffer (5% glycerin, 15mM SDS) and desalinated by ultrafiltration. The mass spectrometer 4800 Plus MALDI TOF/TOF MASS Analyzer (AB SCIEX, USA) equipped with a Nd:YAG laser emitting at 355nm was set to perform data acquisition in linear positive ion mode. 4000 series Explorer (AB SCIEX, USA) were used for data acquisition and processing. The acceleration voltage was set to 20 kV and the extraction delay time used was 1500 ns.

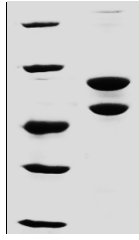

Figure S4. Protein marker (left, 116, 66, 45, 35, 25 kDa) and the results of non-reduced protein sample applied to SDS-PAGE (right). Protein sample was the precipitated assemblies formed by mixing MLPd and MFPI under condition of air-free.



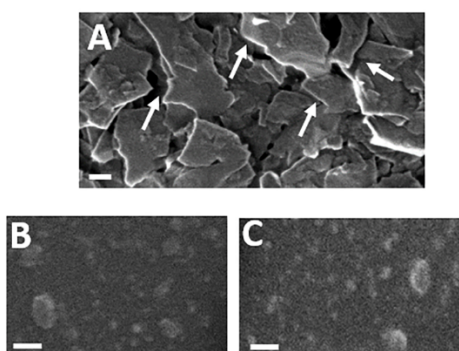

Figure S5. SEM images for samples of unlocked LPd-FPI MESDs (A), MLPd (B), and MFPI (C). Scale bar was 100nm. The boundaries of each layer-like structure were clear, which suggested that there was no linkage between layer-like structures (white arrows in A).

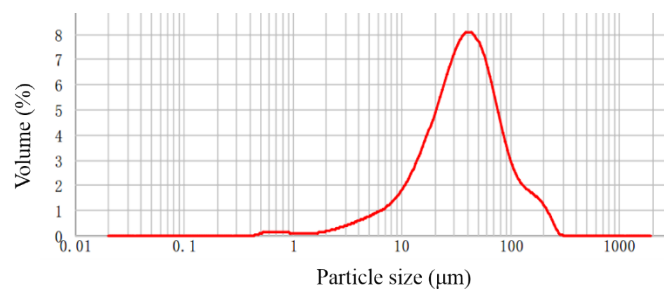

Figure S6. The results of particle size distribution of disulfide-locked LPd-FPI MESDs. Size distribution analysis was carried out by using a MS 2000 laser particle size analyzer (Malvern, UK). The samples were prepared by suspending locked LPd-FPI MESDs in PBS (pH7.0).

## References

- 1 X. Gao, S. Yang, C. Zhao, Y. Ren and D. Wei, *Angewandte Chemie*, 2014, **126**, 14251.
